# Supplementary material
Source: MDPI journal article supplement (https://www.mdpi.com/2073-4441/15/5/989)
Supplement: s1 [file s1]

**Table S1 Parameters for LID facilities**

| Layer          | Parameter                   | Bioretention Cell | Permeable pavement | Green roof |
|----------------|-----------------------------|-------------------|--------------------|------------|
| Surface layer  | Storage depth (mm)          | 200               | 0                  | 35         |
|                | Vegetation volume fraction  | 0.15              | 0                  | 0.15       |
|                | Surface roughness           | 0.24              | 0                  | 0.24       |
|                | Surface slope (%)           | 0.33              | 0                  | 0.33       |
| Soil layer     | Thickness (mm)              | 550               | -                  | 250        |
|                | Porosity                    | 0.5               | -                  | 0.5        |
|                | Field capacity              | 0.2               | -                  | 0.2        |
|                | Wilting point               | 0.1               | -                  | 0.1        |
|                | Conductivity                | 0.5               | -                  | 0.5        |
|                | Conductivity slope          | 10                | -                  | 10         |
|                | Suction head (mm)           | 180               | -                  | 180        |
| Pavement layer | Thickness (mm)              | -                 | 100                | -          |
|                | Void ratio (Voids/Solids)   | -                 | 0.2                | -          |
|                | Impervious surface fraction | -                 | 0                  | -          |
|                | Permeability (mm/hr)        | -                 | 700                | -          |
|                | Clogging factor             | -                 | 0                  | -          |
| Storage layer  | Height (mm)                 | 200               | 260                | -          |
|                | Void ratio                  | 0.75              | 0.4                | -          |
|                | Conductivity                | 0                 | 3.8                | -          |
|                | Clogging factor             | 0                 | 0                  | -          |
| Under drain    | Drain coefficient (mm/hr)   | -                 | 0                  | -          |
|                | Drain exponent              | -                 | 0                  | -          |
|                | Drain offset height         | -                 | 0                  | -          |
|                | Drain delay (hours)         | -                 | 0                  | -          |
| Drainage Mat   | Thickness                   | -                 | -                  | 40         |
|                | Void Fraction               | -                 | -                  | 0.3        |
|                | Roughness                   | -                 | -                  | 0.02       |

**Table S2 The values of water quality model parameters**

| Parameter | $C_1$           | $C_2$      | $C_3$           | $Y_{1COD}$      | $Y_{2COD}$      |
|-----------|-----------------|------------|-----------------|-----------------|-----------------|
| Value     | 6535105         | 2.022      | -6.82           | 1.02            | 0               |
| Parameter | $Y_{3COD}$      | $Y_{4COD}$ | $Y_{1NH_4^+-N}$ | $Y_{2NH_4^+-N}$ | $Y_{3NH_4^+-N}$ |
| Value     | 0.251           | 0          | 0.004           | 0               | 0.468           |
| Parameter | $Y_{4NH_4^+-N}$ | $Y_{1TP}$  | $Y_{2TP}$       | $Y_{3TP}$       | $Y_{4TP}$       |
| Value     | 0               | 0.0034     | 1.34            | 0.447           | 0               |

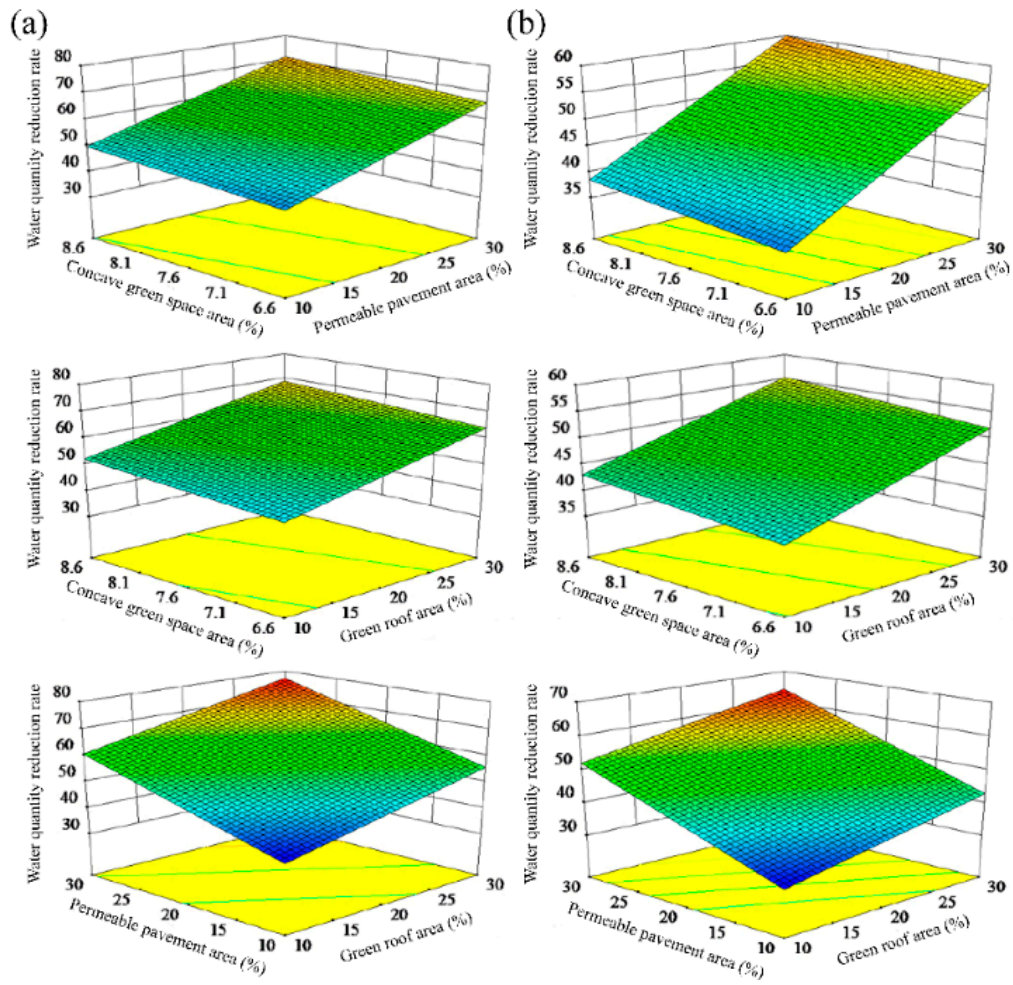

**Figure S1.** Response surfaces for water quantity reduction rate. (a) rainfall intensity once every three years. (b) rainfall intensity once every ten years.

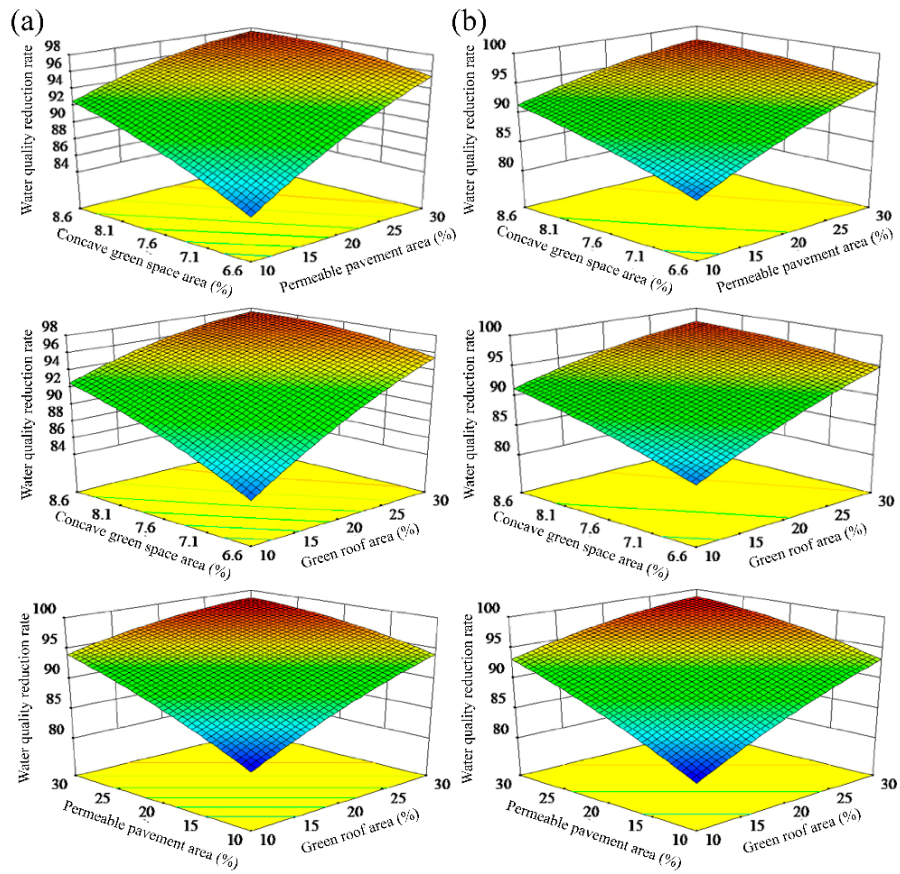

**Figure S2.** Response surface diagram for water quality reduction rate. (a) rainfall intensity once every three years. (b) rainfall intensity once every ten years.
